# Supplementary material for: Accumulation of myeloid lineage cells is mapping out liver fibrosis post injury: a targetable lesion using Ketanserin
Source: PubMed Central journal article supplement (PMC6053408; doi:10.1038/s12276-018-0118-x), 2018-07-19

**Supporting Information Figure 1: Majority of EYFP +ve cells in the liver are F4/80+ve and CD11b+ve.**

(A) FCM analysis of cells isolated from the liver is showing that the majority of EYFP+ cells in the liver are CD11b+. (B) Quantification of the number of F4/80+ EYFP+ cells in the liver, showing the majority of EYFP+ cells in the liver (C) are F4/80+ scale bar 50µm. (D) Double-staining for EYFP and BrdU is showing no EYFP+ cell which is positive for BrdU in Sham and burn group (day 7) and a very limited number of EYFP+ which is positive for BrdU at day 14 post-injury. The arrow shows proliferating EYFP +ve cell; arrowhead shows proliferating EYFP –ve cell; scale bar 100µm. Note that the majority of EYFP+ cells are BrdU negative. Please note that the small red particles which are not pointed out are autofluorescence most probably due to the presence of red blood cells.

**Supporting Information Figure 2: Thermal injury increases the percentage of bone marrow myeloid cells.**

(A and B) Flow cytometry on bone marrow-derived cells shows a 50% increase in the percentage of EYFP +ve cells post-thermal injury.

**Supporting Information Figure 3: Thermal injury up-regulates several pathways that associated with liver injury in the myeloid cells.**

(A) There is an up-regulation of genes in EYFP +ve cells associated with liver dysfunction (B) Pathway analysis shows high up-regulation of the coagulation system in the myeloid cells.

**Supporting Information Figure 4: EYFP+ve cells are skewed more towards a pro-inflammatory phenotype 1-week post thermal injury *in vivo*.** (A) Heat map of up-regulated genes associated with inflammation and wound healing in EYFP+ cells from the livers of sham and thermally injured mice. (B) Measurement of liver function enzymes ALT and AST show Ketanserin is not having a detrimental effect on the liver's functional capacity. (C) Ketanserin does not modulate all the genes, which are associated with pro-inflammatory macrophages. (D) qPCR analysis of relative mRNA expression of M1 and M2 associated genes of BMDM from thermally injured mice treated with vehicle or Ketanserin. (\*P< 0.05).

**Supporting Information Figure 5:** Pathway analysis shows deregulation of numerous pathways associated with inflammation and fibrosis.

**A****Sham**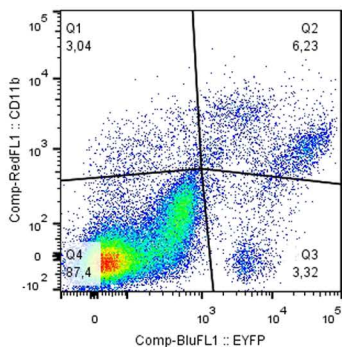**Burn**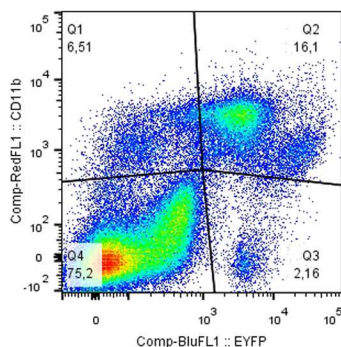**B Liver**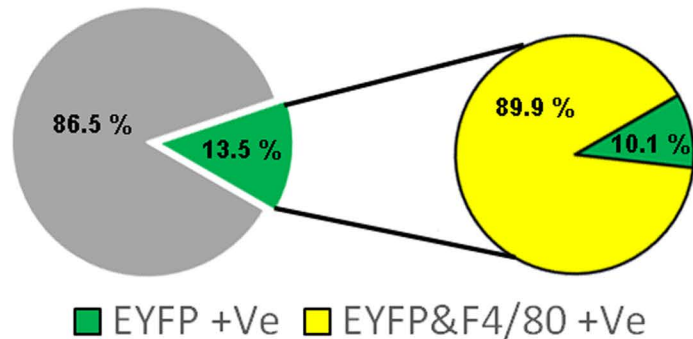**C****Dapi**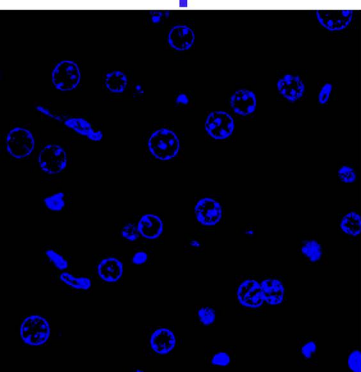**EYFP**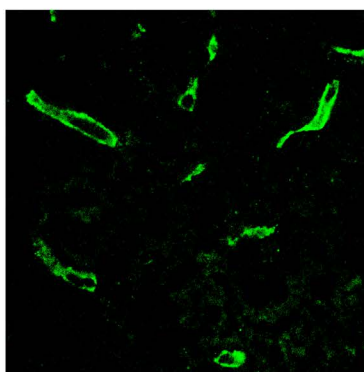**F4/80**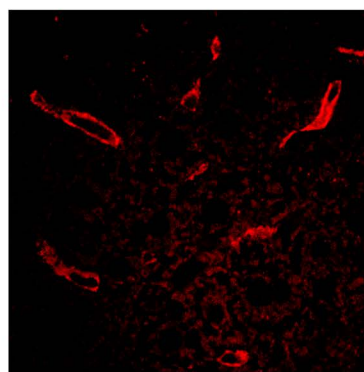**Merged**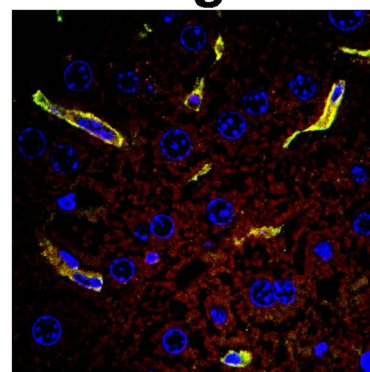**D****Sham**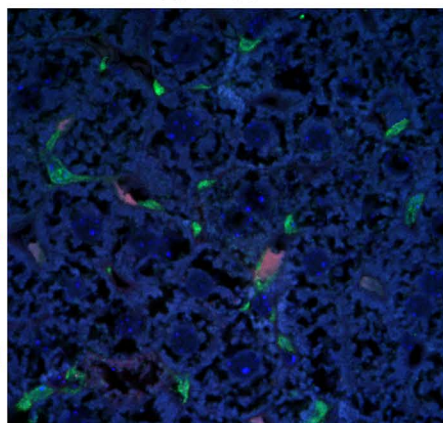**Burn(day 7)**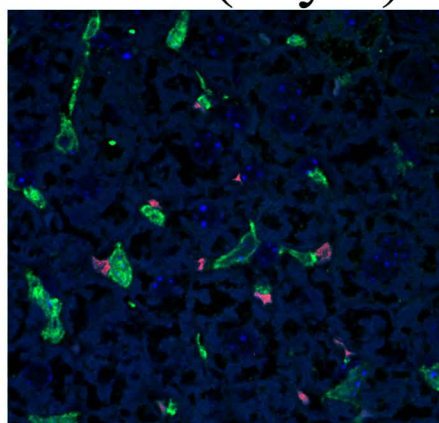**Burn (day 14)**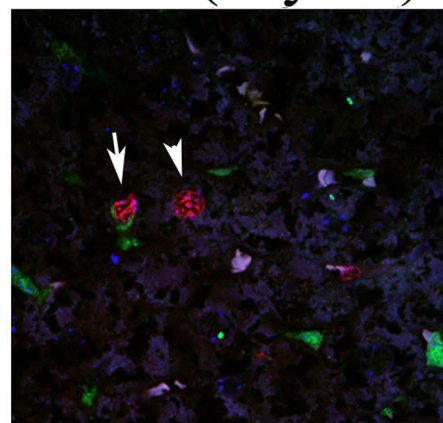**Dapi/Eyfp/BrdU**

**A****Sham**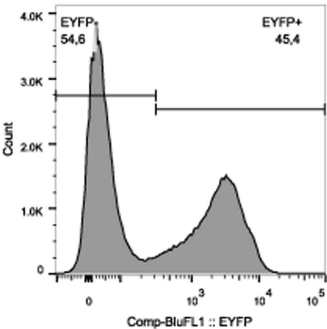**B****Burn**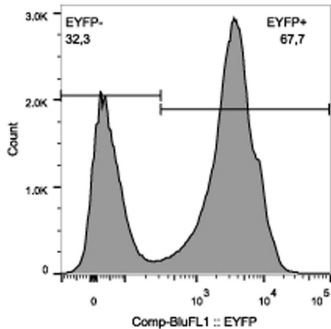



**A**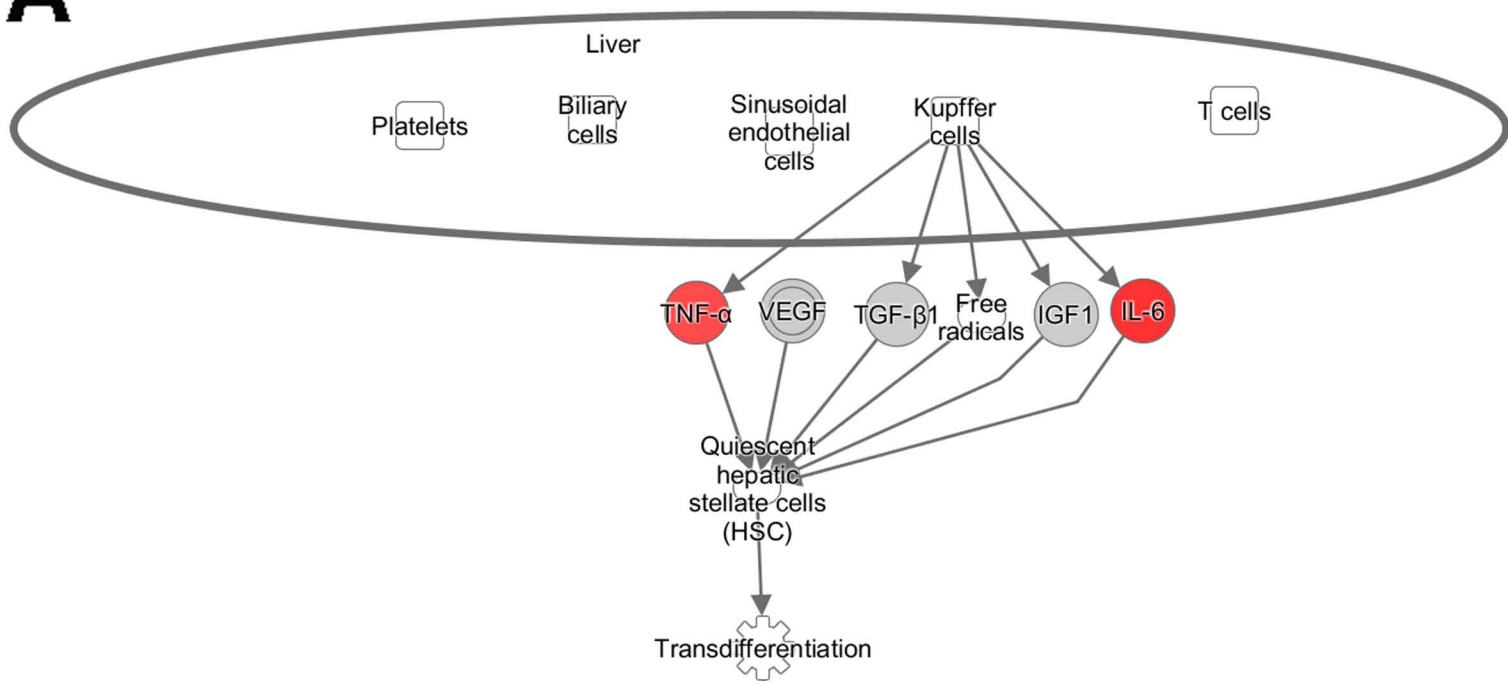**B**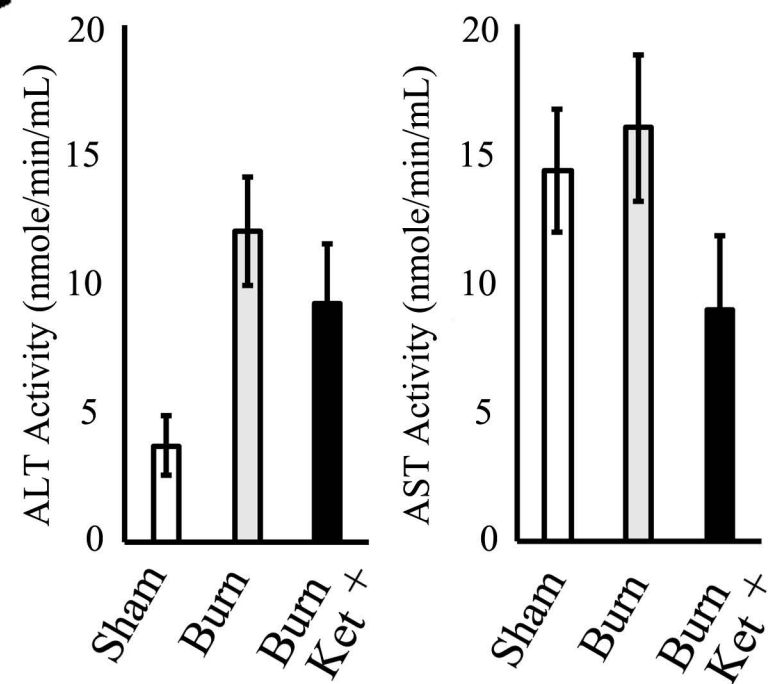**C**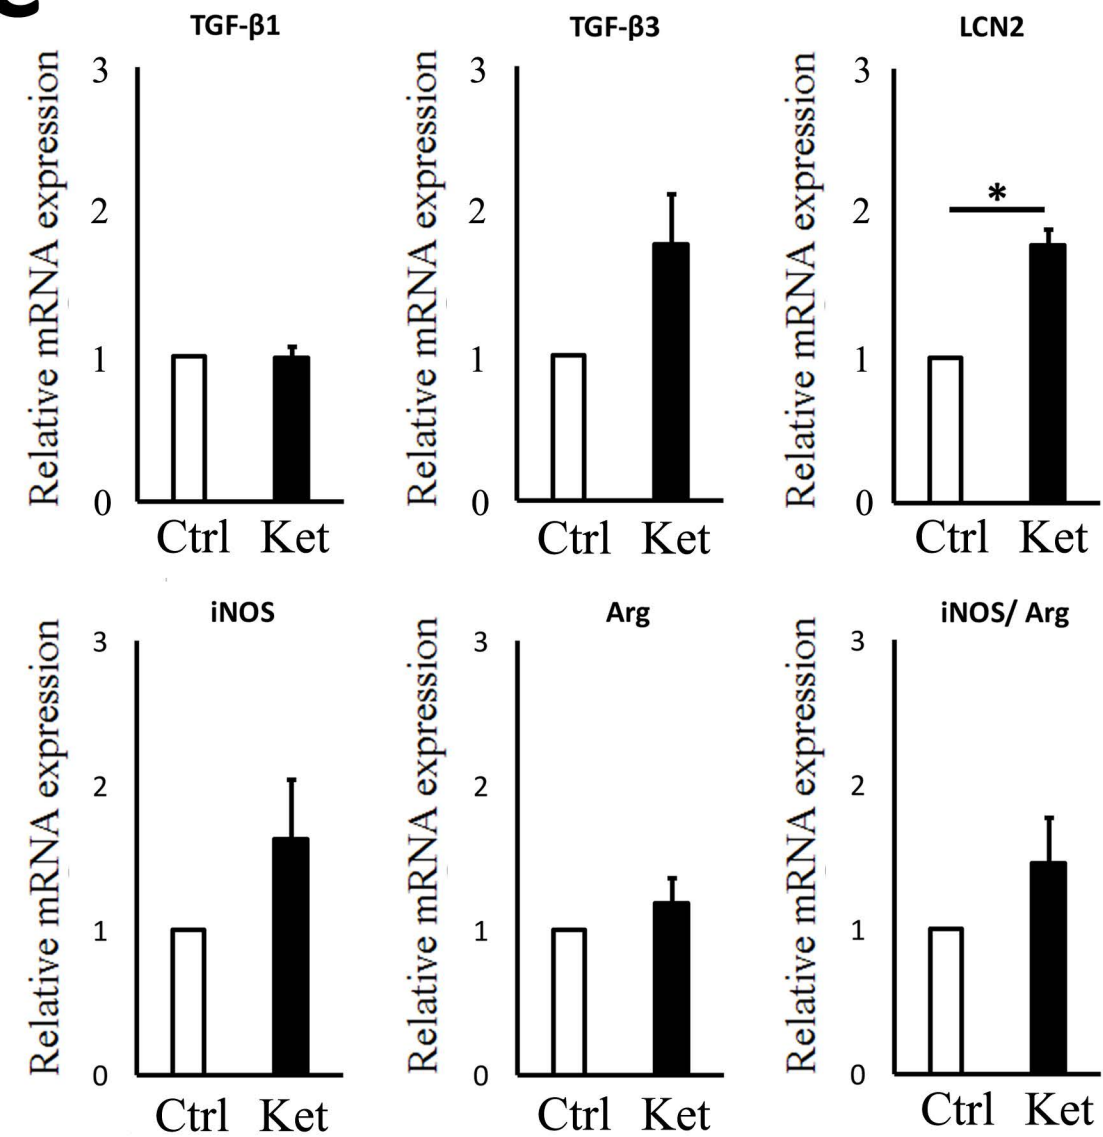**D**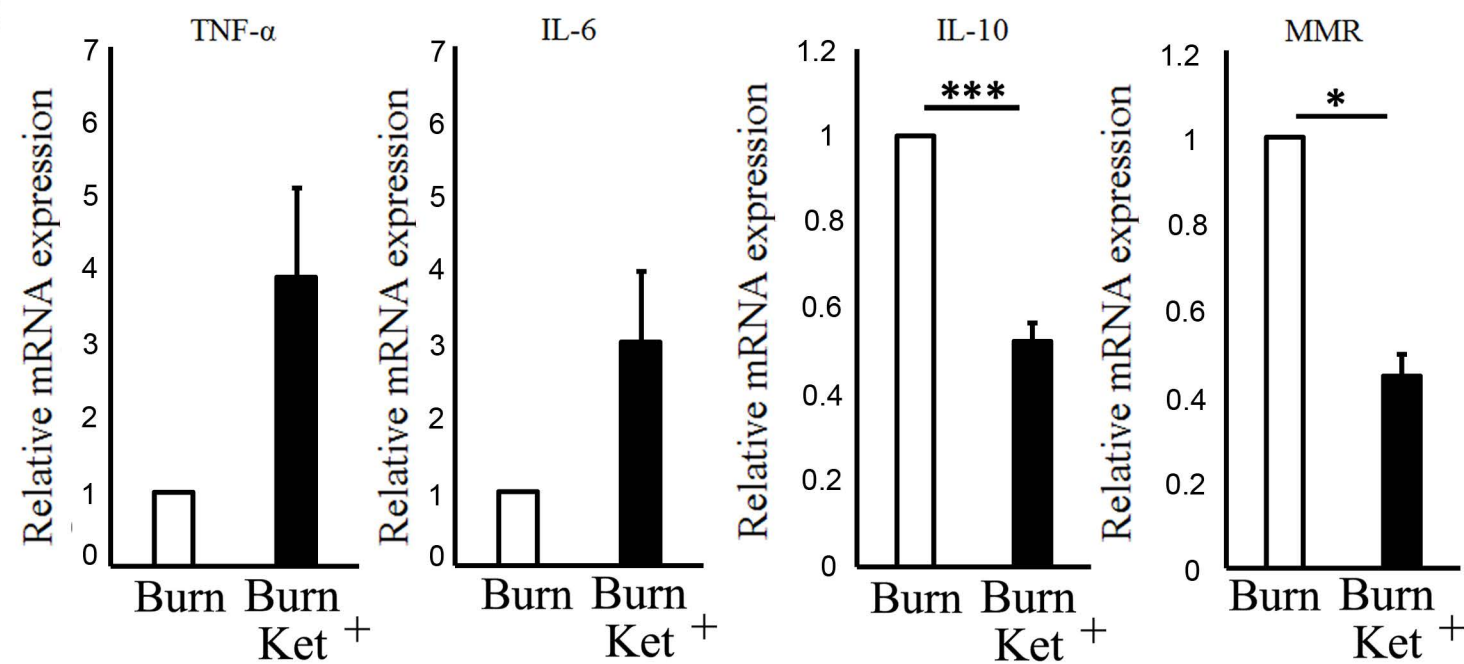

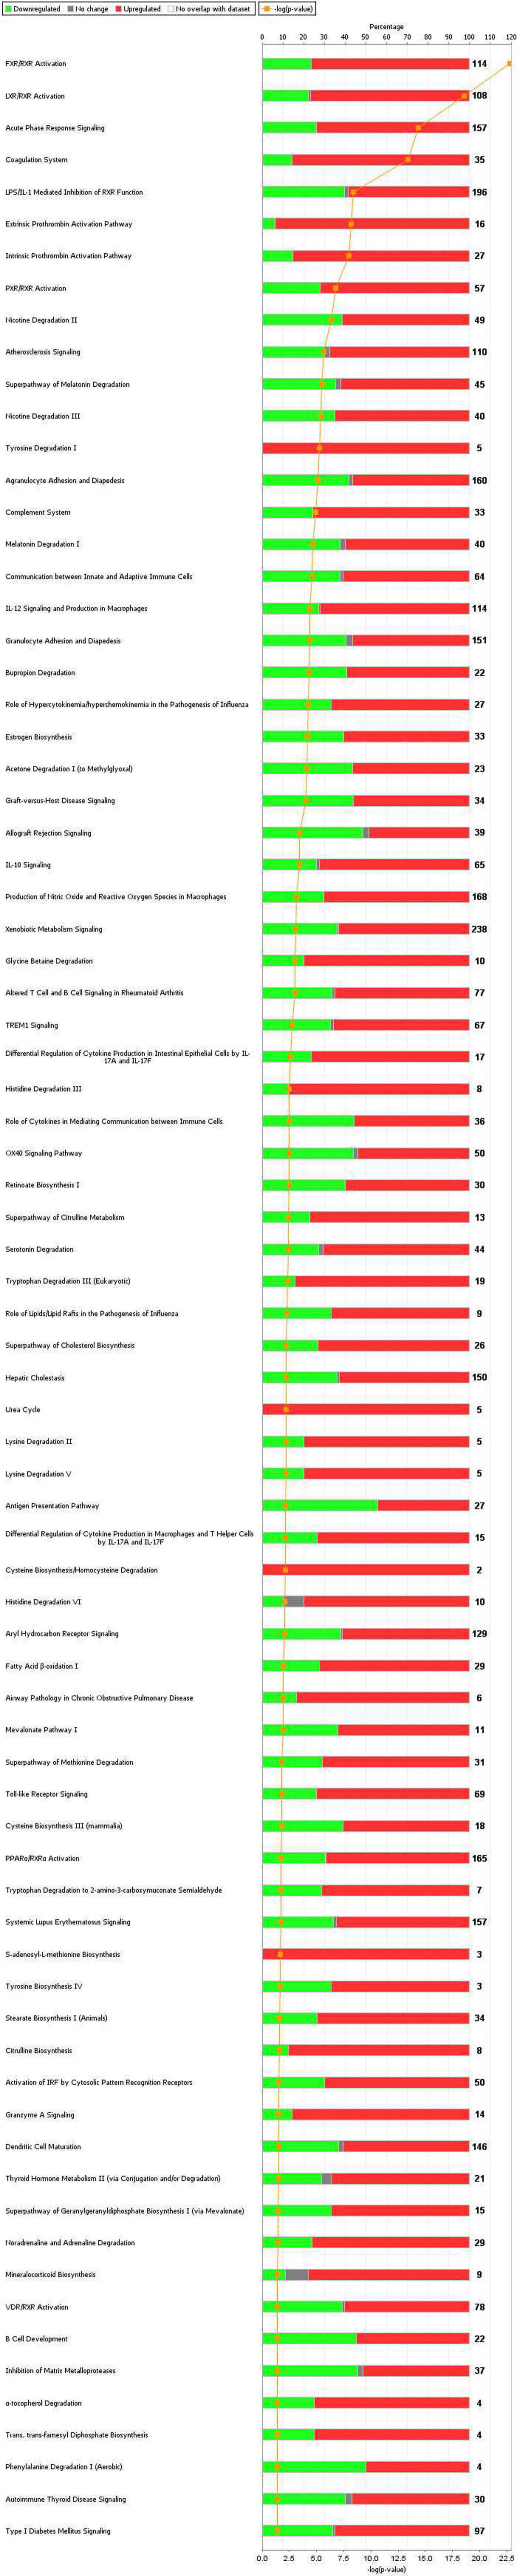

Supplement: 12276_2018_118_MOESM1_ESM.pdf [file 12276_2018_118_MOESM1_ESM.pdf]
